# Supplementary material for: The neuron-specific formin Delphilin nucleates nonmuscle actin but does not enhance elongation
Source: PubMed Central journal article supplement — Mol Biol Cell. 2018 Mar 1;29(5):610–21. doi: 10.1091/mbc.E17-06-0363 (PMC6004577; doi:10.1091/mbc.e17-06-0363), 2018-03-01
Supplement: mbc-29-610-s001.pdf [file mbc-29-610-s001.pdf]

# Supplemental Materials

*Molecular Biology of the Cell*

Silkworth et al.

**Supplementary Data for**

**The Neuron Specific Formin Delphilin Nucleates Non-Muscle Actin but  
Does Not Enhance Elongation**

William T. Silkworth<sup>\*</sup>, Kristina L. Kunes<sup>\*</sup>, Grace C. Nickel<sup>†</sup>, Martin L. Phillips<sup>\*</sup>, Margot E. Quinlan<sup>\*,‡,§</sup>, Christina L. Vizcarra<sup>†,§</sup>

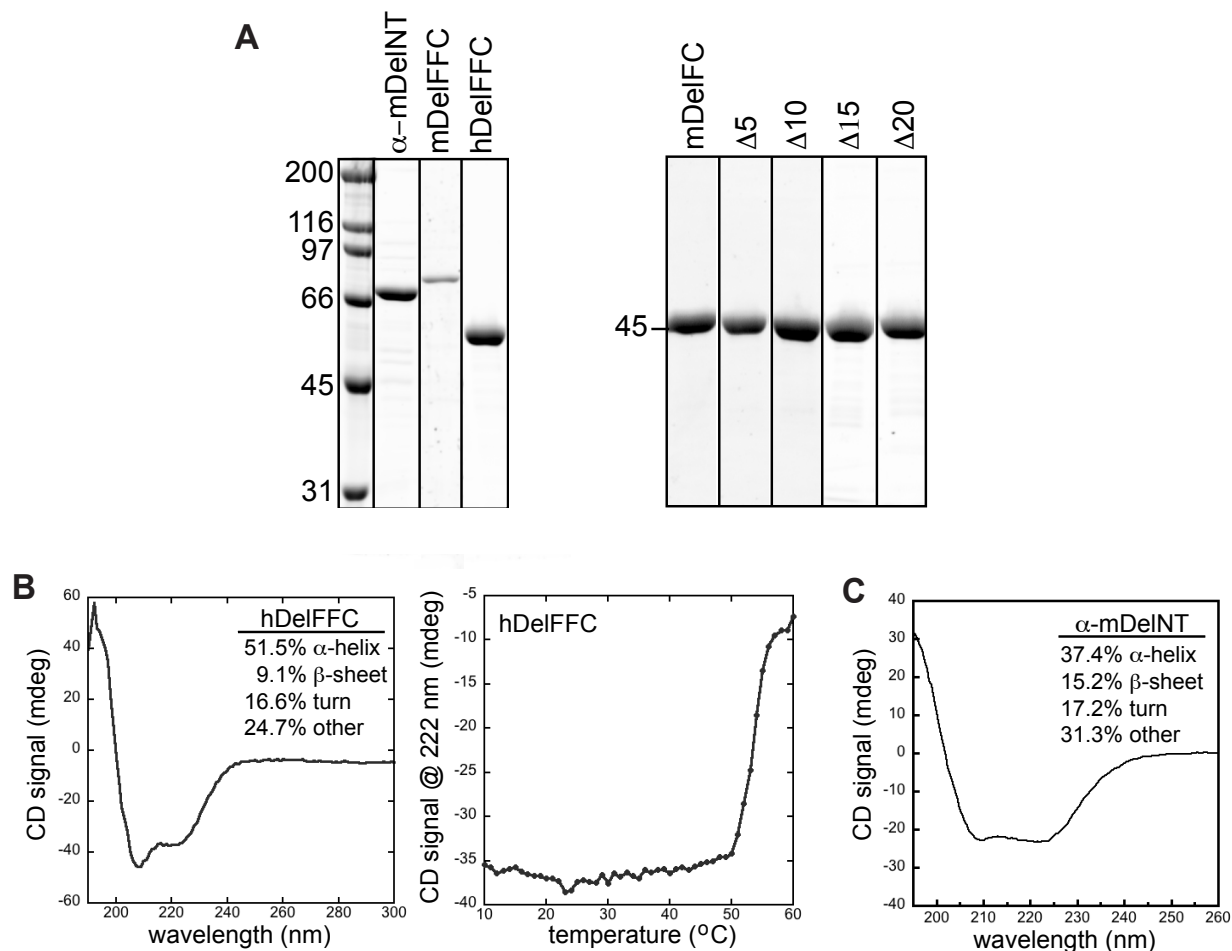

**Figure S1.** Proteins used in this study. A) SDS-PAGE gels of the constructs used in this paper:  $\alpha$ -mDeINT, mDeIFFC, and hDeIFFC are grouped together. mDeIFC, and truncations thereof are grouped separately. B) Circular dichroism analysis of secondary structure of 0.06 mg/ml hDeIFFC. Loss of structure as a function of temperature demonstrates that hDeIFFC is relatively thermal stable compared to other formins. The  $T_m$  ( $\sim 55^\circ\text{C}$ ) is about  $5^\circ$  higher than mDeIFC,  $14^\circ$  higher than mDia1-FH2 (Kupi *et al.*, 2013), and  $20^\circ$  higher than CapuFFC (Vizcarra *et al.*, 2014). C) Circular dichroism analysis of secondary structure of 0.2 mg/ml  $\alpha$ -mDeINT. Most of the secondary structure detected is  $\alpha$ -helical, consistent with a PDZ domain. More than 50% of the construct has secondary structure, suggesting that it is folded.

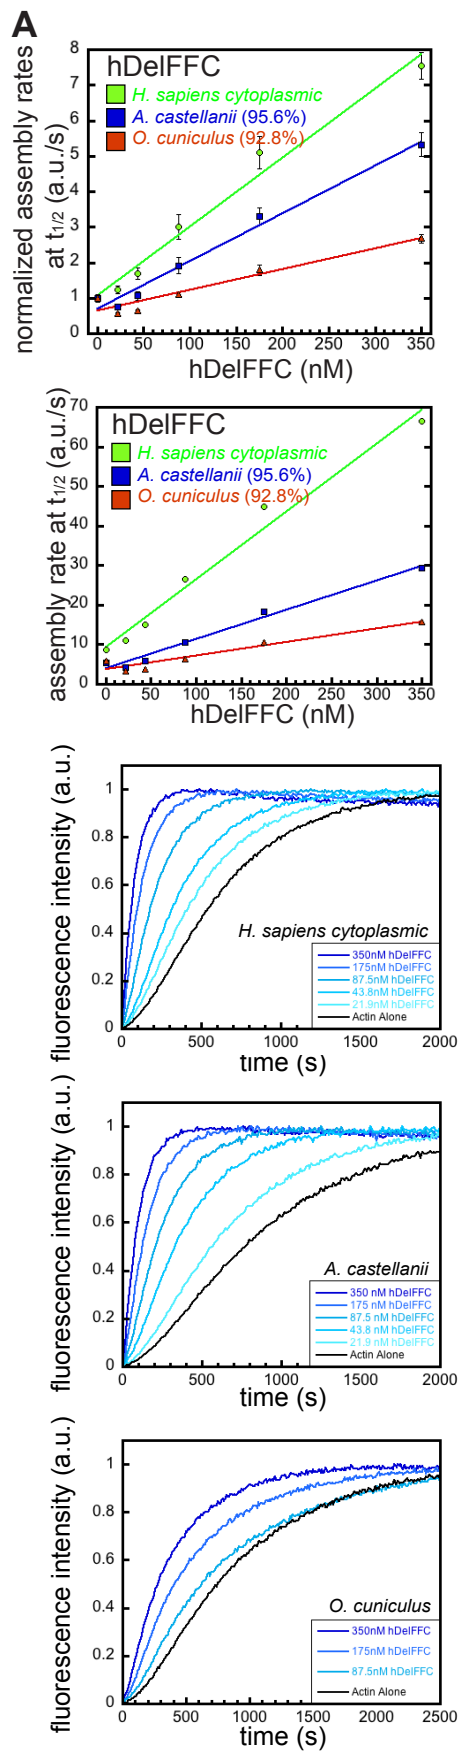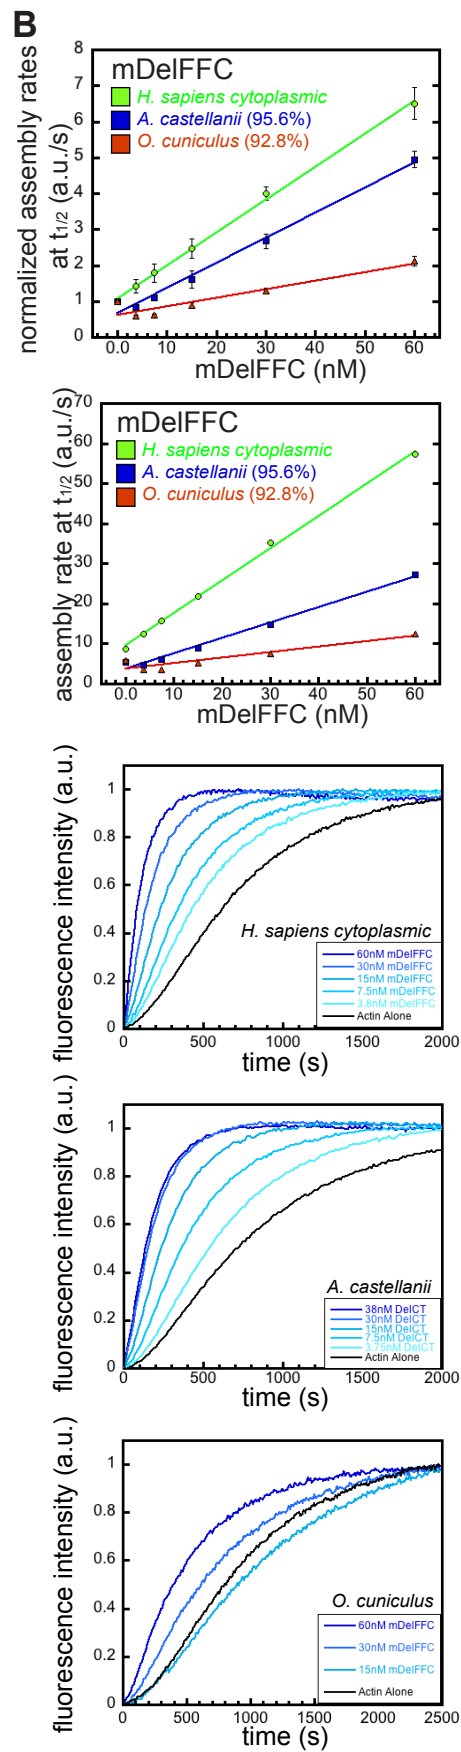

**Figure S2.** Delphilin-mediated assembly rates depend on actin isoform. A) Comparison of hDelFFC-stimulated assembly rates normalized to actin alone (top) or not. Below are raw pyrene actin assembly data with hDelFFC as indicated and 4  $\mu$ M actin (source indicated). B) Comparison of mDelFFC-stimulated assembly rates normalized to actin alone (top) or not. Below are raw pyrene actin assembly data with mDelFFC as indicated and 4  $\mu$ M actin (source indicated).

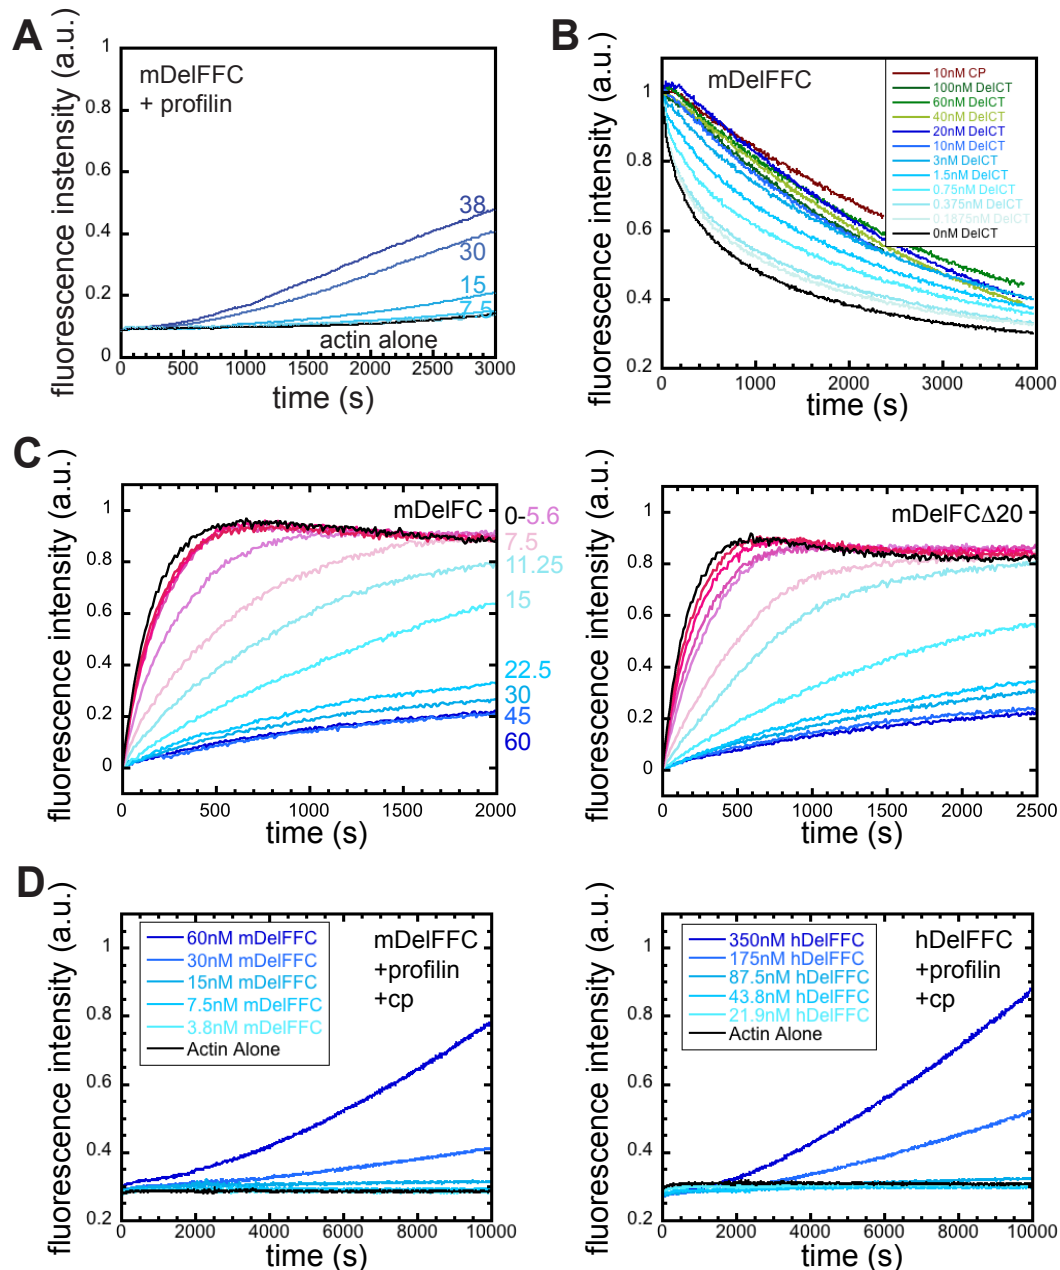

**Figure S3.** Actin polymerization and depolymerization in the presence of Delphinin. A) Pyrene actin assembly assay with mDelFFC concentrations as indicated (nM), 4  $\mu$ M actin and 12  $\mu$ M *S. pombe* profilin. B) Representative normalized depolymerization data. Filamentous actin was diluted to 0.1  $\mu$ M in the presence of increasing concentrations of Delphinin. Capping protein is shown as a control. Analysis of three independent repeats of these assays is shown in Figure 3A. The apparent affinity of mDelFFC for barbed ends is 0.6 nM. C) Representative seeded elongation assays in the presence of increasing concentrations of mDelFC (left) or mDelFC $\Delta$ 20 (right). The IC<sub>50</sub> is 7 nM and elongation is ~97% inhibited in both cases, demonstrating that the C-terminus has little influence on the affinity of Delphinin for barbed ends. This value is also similar to that of mDelFFC under the same conditions (IC<sub>50</sub> = 13 nM). D) Delphinin stimulated actin assembly in the presence of profilin and capping protein. Nucleation is weak but filament elongation at higher concentrations of mDelFFC demonstrates that Delphinin can protect the barbed end in the presence of capping protein.
